# Supplementary material for: Synthesis of a deca-lithium cage containing an [(RN)2As(µ-NR)As(NR)2]4– tetraanion; a homologue of group 15 trianions of the type [E(NR)3]3–Electronic supplementary information (ESI) available: synthesis and spectroscopic details for 1 and 2. See http://www.rsc.org/suppdata/cc/b2/b202858a/
Source: Royal Society of Chemistry journal article supplement (doi:10.1039/b202858a), 2002-05-17
Supplement: b202858a.doc [file b202858a.doc]

*Supplementary Material (ESI) for Chemical Communications*

*This journal is © The Royal Society of Chemistry 2002*

*Synthesis of* **1**; As(NMe2)3 (0.6ml, 1.2mmol, 2.0mol dm-3 in toluene) was added to a solution of 2-amino-5-methyl-thiazole (0.41g, 3.6mmol) in thf (10ml). The yellow solution was heated to reflux briefly. *n*BuLi (2.4ml, 3.6mol, 1.5mol dm-3 in hexanes) was added at –78oC. The mixture was allowed to warm to room temperature and then briefly heated to reflux. The orange solution produced was stirred for 1h at room temperature. Pale pink crystals of **1**.4thf were formed by storage (12h) at room temperature. Crystals of **1**.4thflose *ca.* 2thf ligands per molecule of the complex when placed under vacuum during isolation (presumably two of the lattice bound solvent molecules). The following data refers to this material. Yield 0.139g (22%). Decomp. *ca.* 80oC. IR (NaCl, Nujol), **/cm-1= 3583*w*, 3083*br.m* (N-H str.), 1606*m*, 1505*s*, 1300*m*, 1267*w*, 260*s*, 1178*w*, 1128*s*, 1092*s*, 1033*s*, 867*w*, 800*s*, 711*s*. 1H NMR (400.16MHz, +25oC, D6-DMSO), **= 1.33 (d, 4*J*= 1.2 Hz, CH3, mtaNH-), 1.73 (m, 4H, CH2, thf), 2.15 (d, 4*J*= 1.5Hz, CH3, **-Nmta and mtaN), 3.57 (*m*, 4H, O-CH2, thf), 5.83 (pseudo-d, 4*J*=1.2Hz, CH, mtaNH-), 6.54 (q, 4*J*=1.4Hz, CH, terminal mtaN), 6.67 (s, CH, **-Nmta). 7Li NMR (155.5MHz, +25oC, D6-DMSO, rel. to sat. LiCl/D2O), **= 1.1 (br.s.). Elemental analysis: found C 38.6, H 4.4, N 15.4; cald. for **1**.2thf, C 40.3, H 4.5, N 15.6.

*Synthesis of* **2**; As(NMe2)3 (0.55 mL, 1.1 mmol, 2.0 mol dm-3 in toluene) was added to a solution of 2-amino-5-methyl-thiazole (0.25 g, 2.2 mmol) in thf (10ml). The yellow solution obtained was heated to reflux briefly. The solvent was completely removed by vacuum. The white residue was dissolved in hot toluene (5ml). Colourless needles were formed after storage at 5°C (12hrs). Yield 0.142g (21%). IR (NaCl, Nujol), **/cm-1= 3424*s*, 3262*br.m*, 3125*br.m* (N-H str.), 1615*m*. 1558*m*, 1515*s*, 1333*w*, 1260*s*, 1110*s*, 1051*s*, 1000*s*, 858*w*, 802*s*. Decomp. *ca.* 95°C. 1H-NMR (400 MHz, +25°C, d6-DMSO): **=2.14 (d, 4*J*=1.4 Hz, CH3, **-Nmta and terminal mtaN), 6.52 (q, 4*J*=1.3 Hz, CH, terminal mta), 6.67 (br.s, CH, **-Nmta). Elemental analysis: calc. C 32.0, H 3.0, N 18.7; found: C 34.2, H 4.0, N 18.4. Compound **2** is also obtained from the 1:3 molar ratio reaction of As(NMe2)3 with mtaNH2 using the same method as above, although it is contaminated with mtaNH2. Anomalously, the integration of the mta CH and Me groups in the 1H NMR spectra **1** and **2** was significantly different from the anticipated 1:3 ratio (despite the fact that both are coupled to each other with the anticipated doublet and quartet patterns). This problem could not be resolved by changing the solvent (to thf) or by increasing the relaxation delay to up to 1min.

¶
